# Supplementary material for: Targeting EZH2 histone methyltransferase activity alleviates experimental intestinal inflammation
Source: PubMed Central journal article supplement (PMC6547712; doi:10.1038/s41467-019-10176-2), 2019-06-03
Supplement: 41467_2019_10176_MOESM1_ESM.pdf [file 41467_2019_10176_MOESM1_ESM.pdf]

## **Supplementary Information**

### **Targeting EZH2 Histone Methyltransferase Activity Alleviates Experimental Intestinal Inflammation**

Zhou et al.

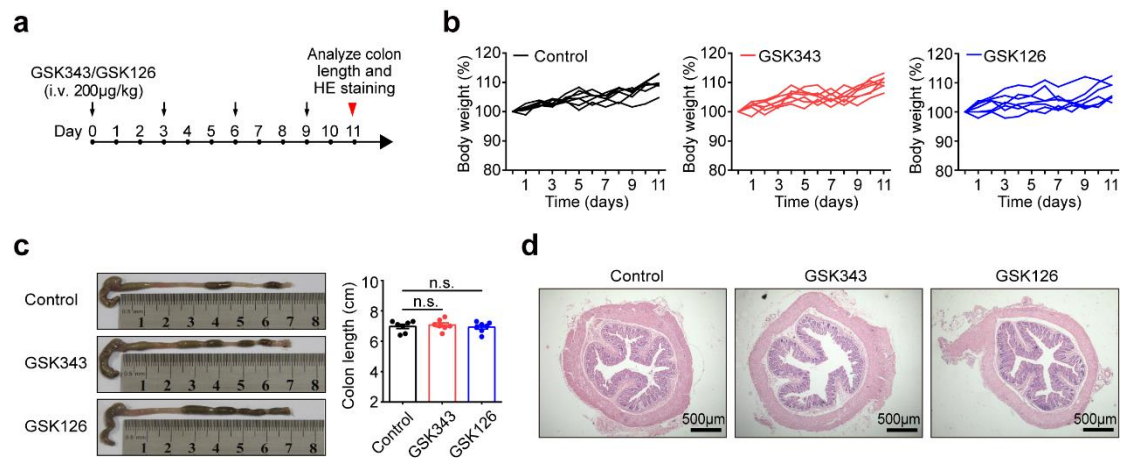

**Supplementary Figure 1. GSK343 and GSK126 are safe to mice.** (a) Protocol for GSK343 and GSK126 treatment in C57BL/6 mice. (b) Body weight of mice that injected with vehicle (control) or GSK343 or GSK126 (n=7 per group). (c, d) Colon length (c) and representative hematoxylin and eosin (H&E) staining of histological sections of the distal colon (d) at day 11 (n = 7 per group). Data are representative of three independent experiments. The statistical significance of differences was determined by one-way analysis of variance followed by Bonferroni post-test (c). n.s. = not significant. Results are presented as the means  $\pm$  standard error of the mean (SEM). Source data are provided as a Source Data file.

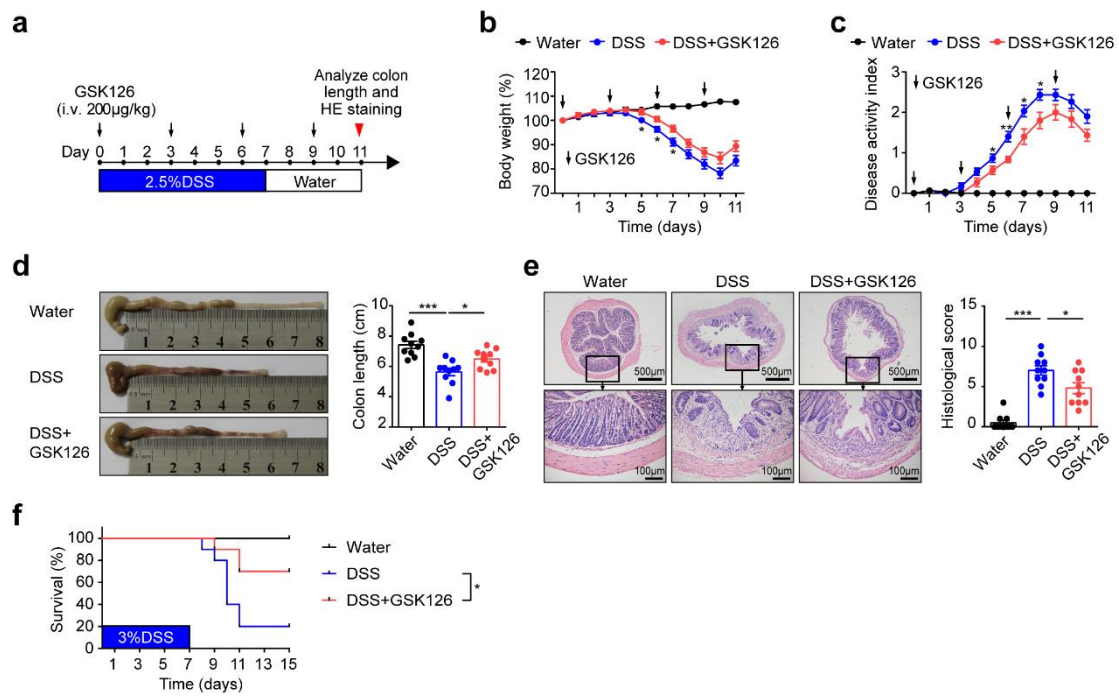

**Supplementary Figure 2. Inhibition of EZH2 activity with GSK126 alleviates DSS-induced acute colitis.** (a) Protocol for DSS-induced acute colitis in C57BL/6 mice and GSK126 administration. (b, c) Body weight (b) and disease activity index (c) of mice that received regular drinking water alone or 2.5% DSS or 2.5% DSS combined with GSK126 injection (n=10 per group). Asterisk indicates DSS versus DSS+GSK126. (d, e) Colon length (d), representative H&E staining of histological sections of the distal colon and corresponding histological scores (e) at day 11 after DSS administration (n = 10 per group). (f) Survival curves from indicated treatment cohorts (n = 10 per group). Data are representative of three independent experiments. \* $P < 0.05$  by log-rank test. (b-e) Data are representative of three independent experiments. The statistical significance of differences was determined by two-way analysis of variance with Bonferroni post-test (b, c) and one-way analysis of variance followed by Bonferroni post-test (d, e). \* $P < 0.05$ , \*\* $P < 0.01$ , \*\*\* $P < 0.001$ . Results are presented as the means  $\pm$  SEM. Source data are provided as a Source Data file.

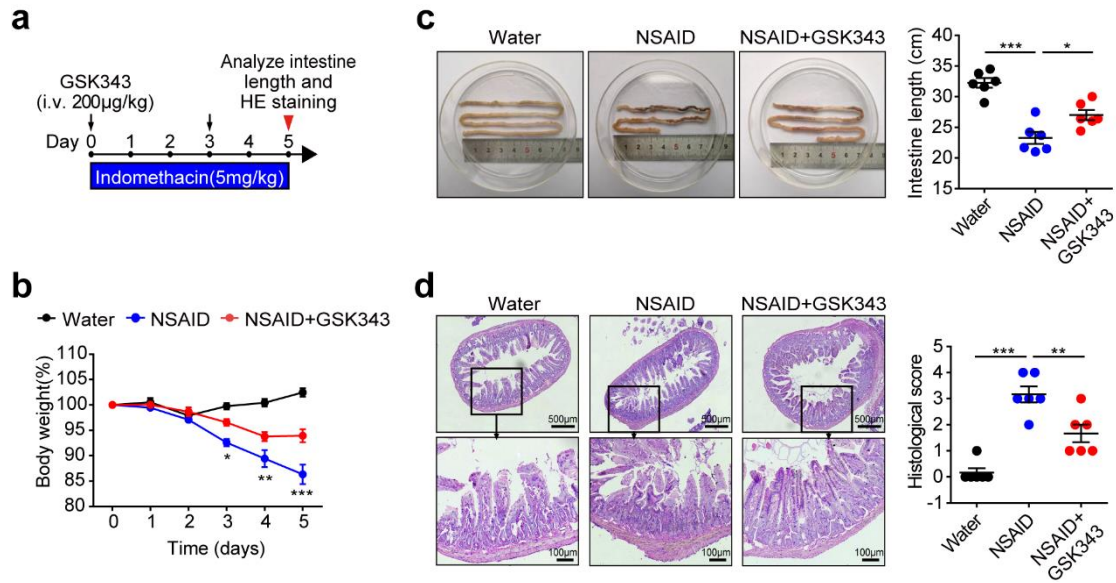

**Supplementary Figure 3. Inhibition of EZH2 activity reduced the severity of indomethacin-induced enteropathy.** (a) The flow diagram of indomethacin-induced acute enteropathy and GSK343 administration. (b) Body weight of mice that received regular drinking water alone (“Water” group; Black dotted line) or 5mg/kg indomethacin (“NSAID” group; Blue dotted line) or 5mg/kg indomethacin combined with GSK343 treatment (“NSAID+GSK343” group; Red dotted line) (n = 6 per group). Asterisk indicates “NSAID” group versus “NSAID+GSK343” group. (c, d) Intestine length (c), representative H&E staining of small intestine sections and corresponding histological scores (d) at day 5 after indomethacin administration (n = 6 per group). (b-d) Data are representative of three independent experiments. The statistical significance of differences was determined by two-way analysis of variance with Bonferroni post-test (b) and one-way analysis of variance followed by Bonferroni post-test (c, d). \* $P < 0.05$ , \*\* $P < 0.01$ , \*\*\* $P < 0.001$ . Error bars indicate means  $\pm$  SEM. Source data are provided as a Source Data file.

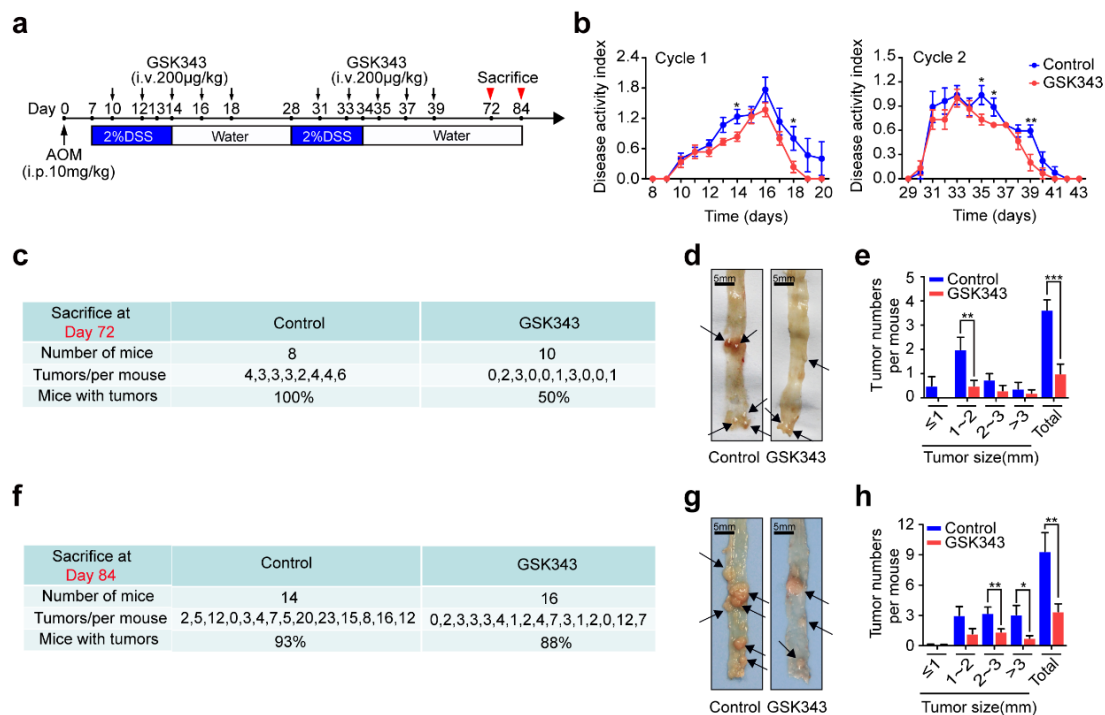

**Supplementary Figure 4. Therapeutic inhibition of EZH2 activity during colitis reduces colitis-associated colorectal cancer (CAC).** C57BL/6 mice were given a single intraperitoneal injection of azoxymethane (AOM) followed by 2 cycles of 2% DSS. During each cycle, mice were intravenously injected with either vehicle (control) or GSK343 every other day for 5 times when more than half of mice presented colitis symptoms. **(a)** Induction procedure for AOM/DSS-induced CAC in C57BL/6 mice and GSK343 administration. **(b)** Disease activity index during each treatment cycle ( $n = 9-10$  for control;  $n=10$  for GSK343 group). **(c-e)** Summarized results **(c)**, representative images of colorectal tumors **(d)**, number and size distribution of colorectal tumors **(e)** at day 72 in AOM/DSS-induced mice treated with or without GSK343 ( $n = 8$  for control;  $n = 10$  for GSK343). **(f-h)** Summarized results **(f)**, representative images of colorectal tumors **(g)**, number and size distribution of colorectal tumors **(h)** at day 84 of the indicated groups ( $n=14$  for control;  $n =16$  for the GSK343 group). **(d, g)** Arrows indicate colorectal tumors. Throughout, data are representative of three independent experiments. The statistical significance of differences was determined by two-way analysis of variance followed by Bonferroni post-test **(b)** and unpaired two-tailed Student's *t*-test **(e, h)**. \* $P < 0.05$ , \*\* $P < 0.01$ , \*\*\* $P < 0.001$ . Error bars indicate means  $\pm$  SEM. Source data are provided as a Source Data file.

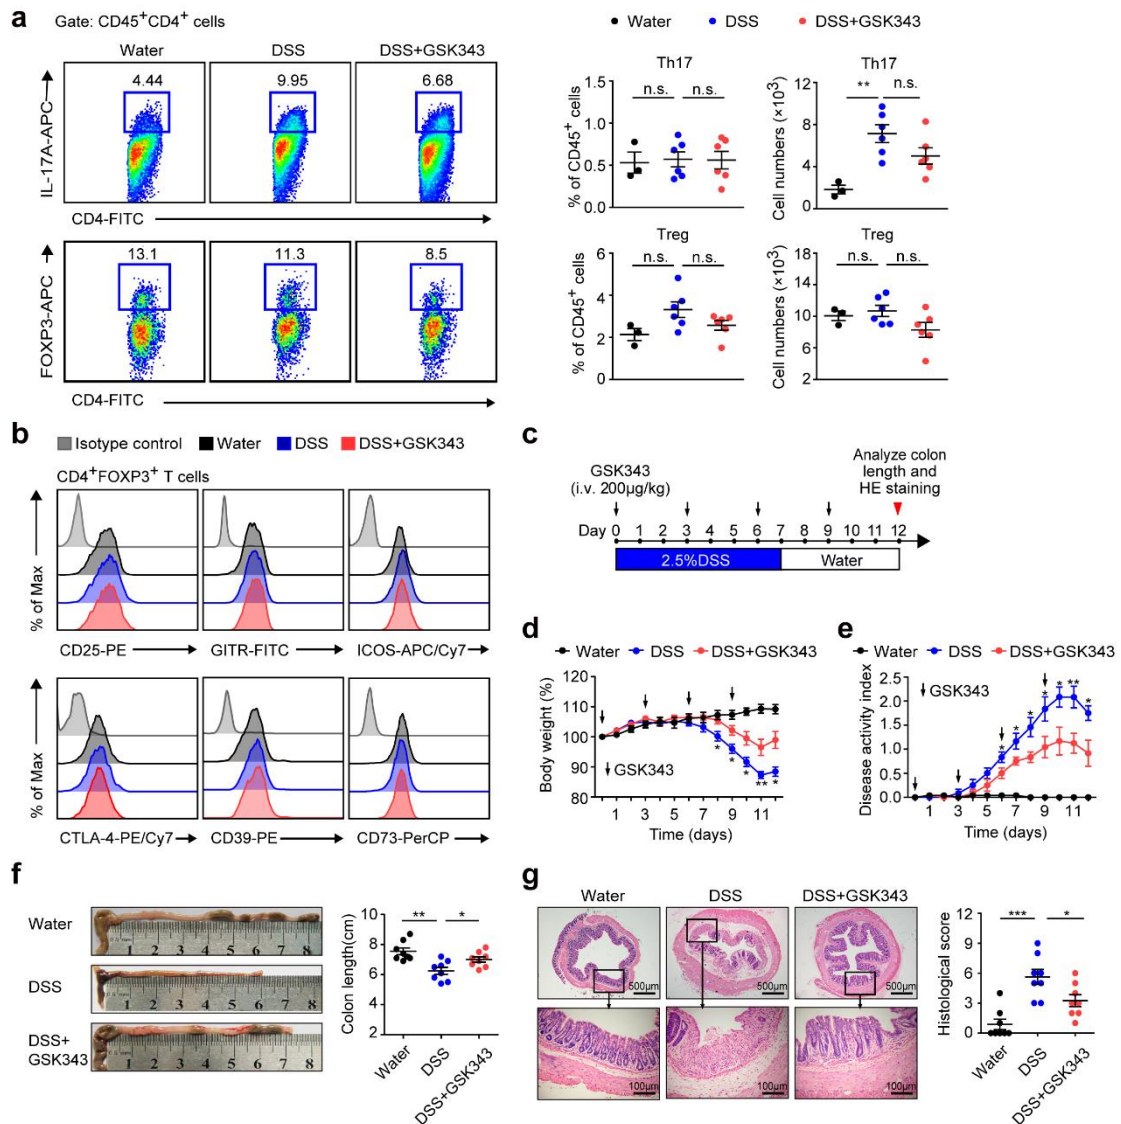

**Supplementary Figure 5. Pharmacological inhibition of EZH2 activity attenuates DSS-induced acute colitis independent of influence on adaptive immunity.** (a, b) C57BL/6 mice were exposed to either 2.5% DSS-containing or regular drinking water alone for 5 days. DSS-treated mice were intravenous injection with either vehicle or GSK343 at day 0, 3. (a) At day 5, representative staining, frequencies and absolute numbers of IL-17A<sup>+</sup> Th17 cells and Foxp3<sup>+</sup> Treg cells in CD45<sup>+</sup> cells from colonic lamina propria (cLP) (n = 3, Water; n = 6 for both DSS and DSS+GSK343). Dot plots are gated on CD45<sup>+</sup> CD4<sup>+</sup> cells. Numbers adjacent to outlined areas indicate the percentage of cells for the indicated markers. (b) Five days post DSS administration, the expression of cell-surface markers in Treg (CD4<sup>+</sup> Foxp3<sup>+</sup>) cells isolated from cLP was determined by flow cytometry (n = 3-5 for Water; n = 5-7 for both DSS and DSS+GSK343). (c) Methods for DSS-induced colitis in NOD/SCID mice and GSK343 administration. (d, e) Changes

in body weight (**d**) and disease activity index (**e**) of mice that received regular drinking water alone or 2.5% DSS or 2.5% DSS combined with GSK343 injection (n=8 per group). (**f**, **g**) Representative images of colons and colon length (**f**), representative H&E staining of distal colon sections and corresponding histological scores (**g**) at day 12 after DSS exposure (n=8 per group). Throughout, data are representative of three independent experiments and are expressed as the mean  $\pm$  SEM. The statistical significance of differences was determined by one-way analysis of variance followed by Bonferroni post-test (**a**, **f**, **g**) and two-way analysis of variance followed by Bonferroni post-test (**d**, **e**). \* $P < 0.05$ , \*\* $P < 0.01$ , \*\*\* $P < 0.001$ , n.s. = not significant. Source data are provided as a Source Data file.

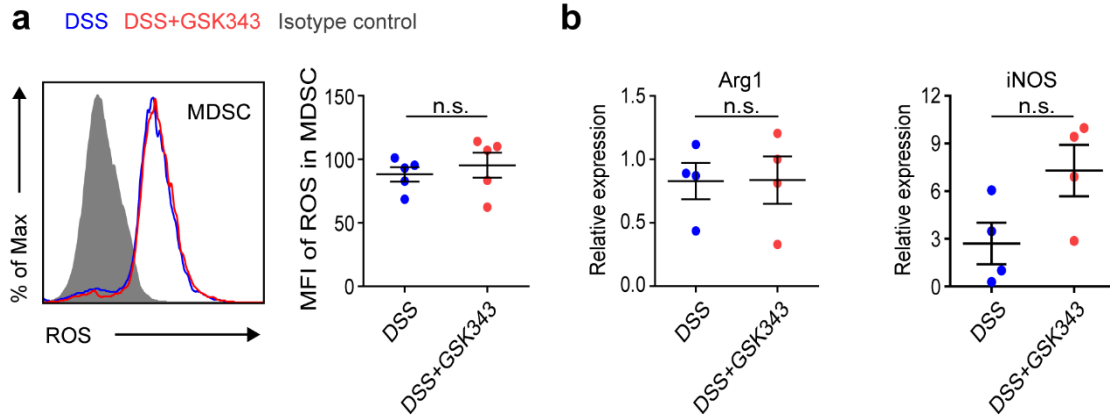

**Supplementary Figure 6. Chemical inhibition of EZH2 activity has no obvious effect on MDSCs function during DSS-induced acute colitis.** C57BL/6 mice were exposed to 2.5% DSS in the drinking water, tail vein-injected with vehicle or GSK343 at day 0, 3. At day 5, **(a)** histograms and MFI quantification of ROS in colonic MDSCs (CD11b<sup>+</sup> Gr-1<sup>+</sup>) isolated from DSS-exposed mice that were treated with vehicle (blue) or GSK343 (red) (n=5 per group). **(b)** The expression of Arg-1 and iNOS in colonic MDSCs (CD11b<sup>+</sup> Gr-1<sup>+</sup>) from cLP was examined by real-time PCR (n = 4 per group). All experiments were performed at least three times and the data are expressed as means  $\pm$  SEM. n.s. = not significant (as determined by unpaired two-tailed Student's *t*-test). Source data are provided as a Source Data file.



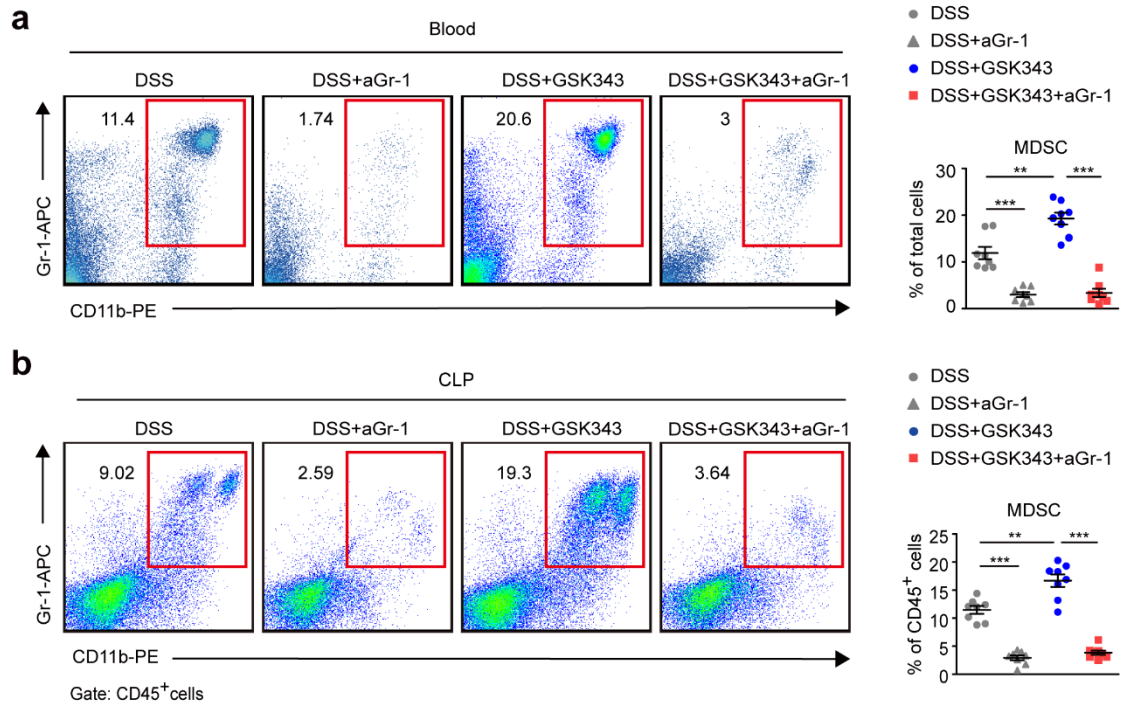

**Supplementary Figure 7. Injection of the monoclonal antibody to Gr-1 (aGr-1) efficiently depletes MDSCs in the peripheral blood and cLP.** C57BL/6 mice were challenged with 2.5% DSS in the drinking water and intravenously injected with or without GSK343 at day 0, 3. Anti-Gr-1 antibody or isotype control was then administered intraperitoneally into the indicated mice at day 3. **(a)** Representative flow cytometry dot plots and relative proportion of CD11b<sup>+</sup> Gr-1<sup>+</sup> MDSCs in the peripheral blood at day 4 after DSS treatment (n = 8 per group). **(b)** Representative flow cytometry dot plots and relative proportion of CD11b<sup>+</sup> Gr-1<sup>+</sup> MDSCs in CD45<sup>+</sup> cells among cLP at day 5 after DSS treatment (n = 8 per group). Throughout, numbers adjacent to outlined areas indicate percentage of CD11b<sup>+</sup> Gr-1<sup>+</sup> cells in each group. Data are representative of three independent experiments. \*\**P* < 0.01, \*\*\**P* < 0.001 (as determined by one-way analysis of variance with Bonferroni post-test). Error bars indicate means ± SEM. Source data are provided as a Source Data file.

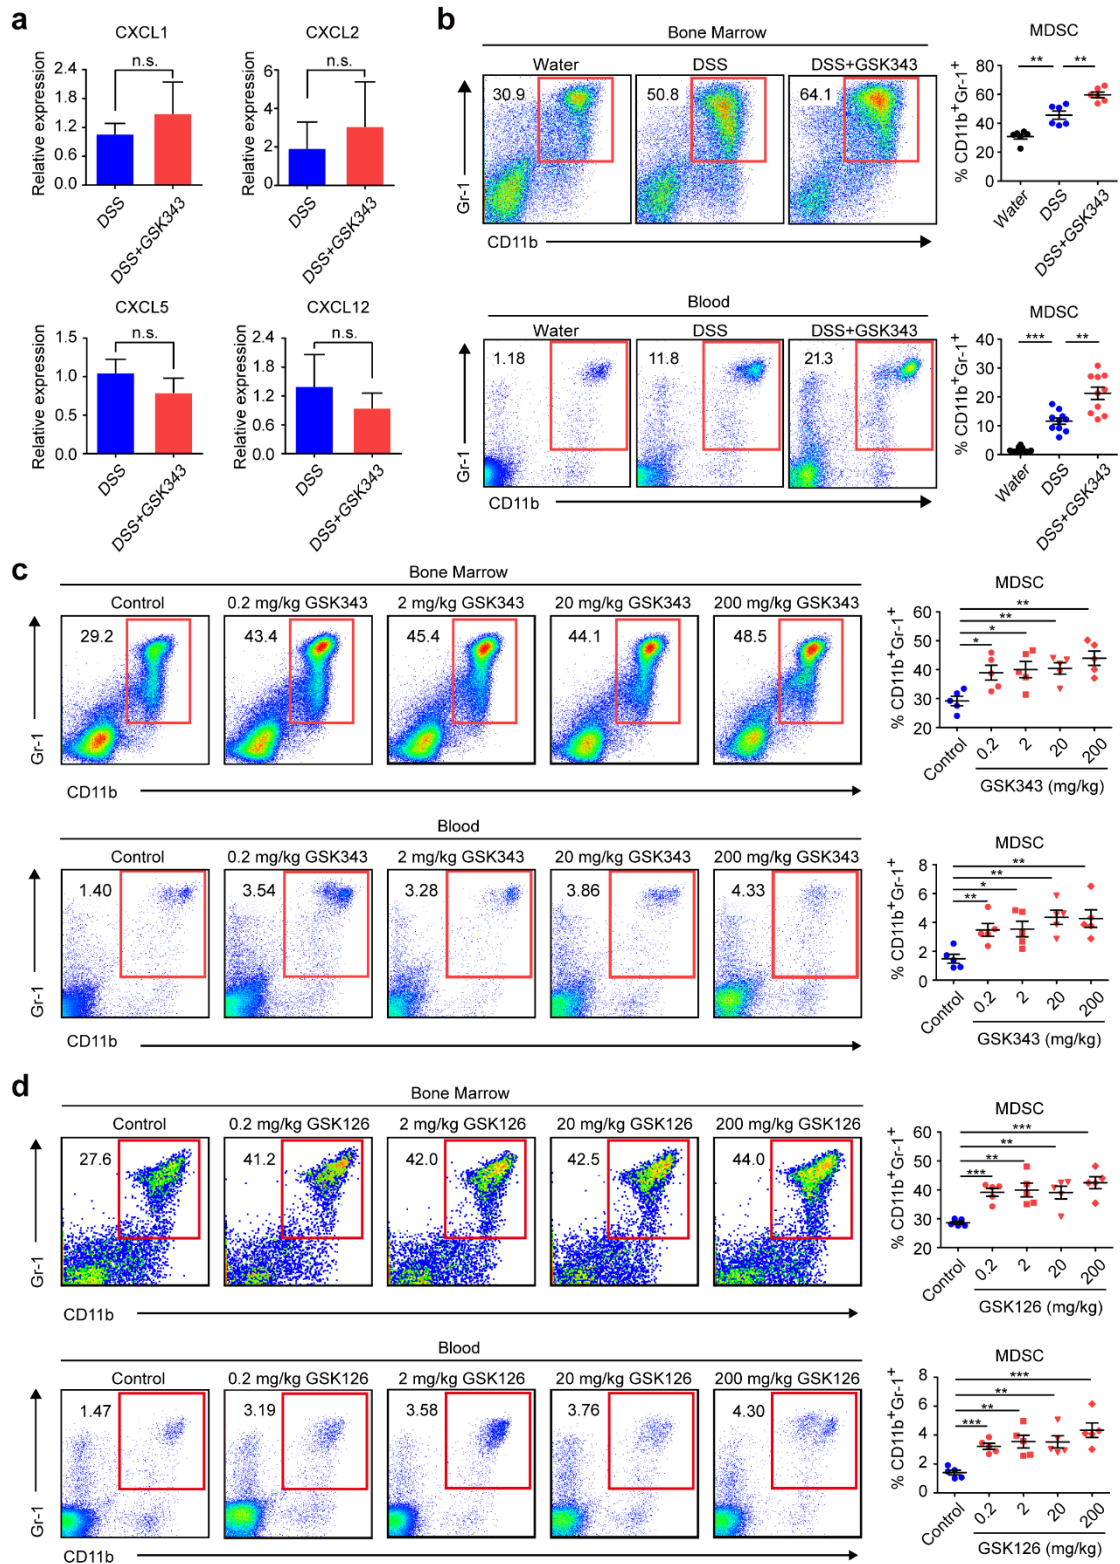

**Supplementary Figure 8. Increased colonic MDSCs after EZH2 inhibition may be due to increased MDSCs generation in the bone marrow. (a, b)** C57BL/6 mice were administered drinking water supplemented with 2.5% DSS, and intravenously injected with vehicle control or

GSK343 at day 0, 3. **(a)** At day5, the expression of MDSC-related chemokines within distal colonic tissues were detected by quantitative real-time PCR analysis (n= 4 per group). **(b)** Representative flow cytometry plots and frequency of CD11b<sup>+</sup>Gr-1<sup>+</sup> MDSCs in the bone marrow (n= 6 per group) and peripheral blood (n= 10 per group) at day 4 after DSS induction. **(c)** C57BL/6 mice were injected intravenously at day 0 and 3 with vehicle or with different doses of GSK343 as indicated. At day 4, the representative dot plots and frequencies of MDSCs (CD11b<sup>+</sup>Gr-1<sup>+</sup>) in the bone marrow and peripheral blood (n= 5 per group) were determined by flow cytometry. **(d)** Vehicle or different doses of GSK126 were injected intravenously into C57BL/6 mice at day 0 and 3. At day 4, the representative dot plots and frequencies of MDSCs (CD11b<sup>+</sup>Gr-1<sup>+</sup>) in the bone marrow and peripheral blood (n= 5 per group) were determined by flow cytometry. Throughout, data are representative of three independent experiments. \**P* < 0.05, \*\**P* < 0.01, \*\*\**P* < 0.001, n.s.= not significant (as determined by one-way analysis of variance followed by Bonferroni post-test). Results are presented as the means ± SEM. Source data are provided as a Source Data file.

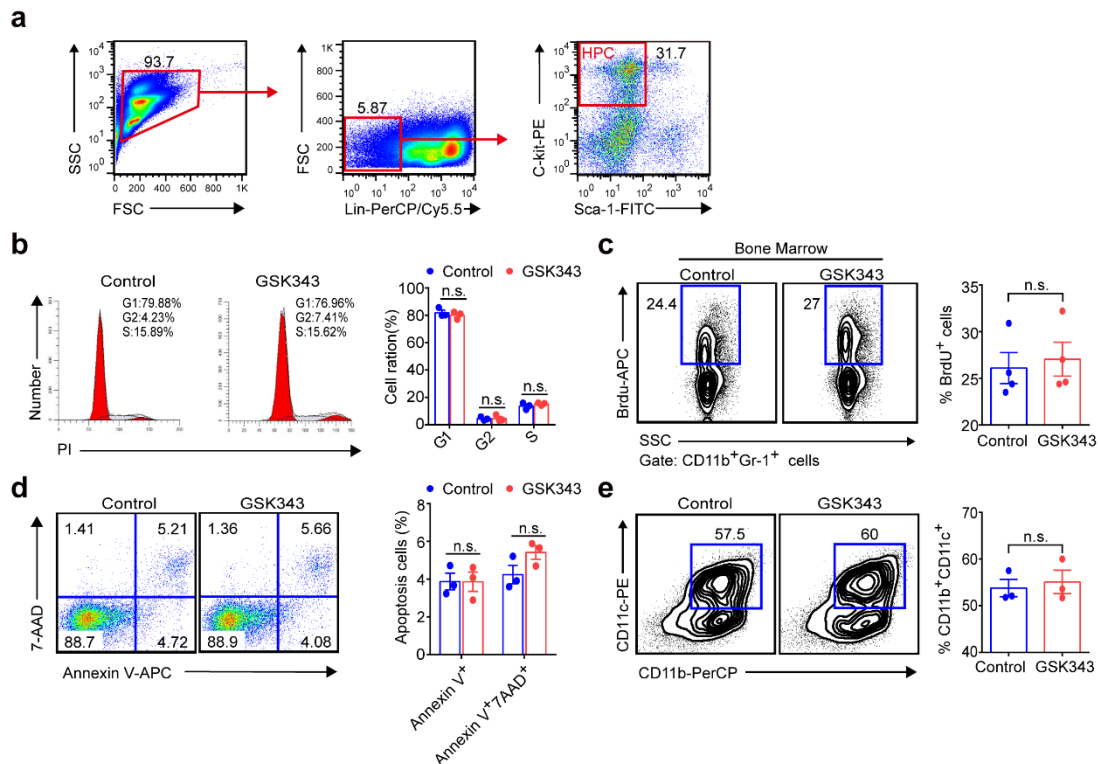

**Supplementary Figure 9. EZH2 inhibitor did not apparently affect the proliferation, apoptosis and differentiation of MDSCs.** (a) Gating strategy for HPC (Lin<sup>-</sup>Sca-1<sup>+</sup>C-kit<sup>+</sup>). (b) Sort-purified MDSCs from bone marrow of C57BL/6 mice were cultured with vehicle (control) or GSK343 for 3 days, the cell cycle distribution was then examined by flow cytometry (n=3 per group). (c) C57BL/6 mice were injected intravenously with vehicle or GSK343 at day 0 and day 3. At day 4, BrdU incorporation by MDSCs in the bone marrow was analyzed by flow cytometry (n=4 per group). Dot plots are gated on CD11b<sup>+</sup>Gr-1<sup>+</sup> MDSCs. Numbers adjacent to outlined areas indicate the percentage of BrdU<sup>+</sup> cells. (d) Sort-purified MDSCs from bone marrow were treated with vehicle or GSK343 for 3 days, representative staining and frequencies of AnnexinV<sup>+</sup>7AAD<sup>-</sup> (early apoptotic cells) and AnnexinV<sup>+</sup>7AAD<sup>+</sup> (late apoptotic cells) cells were assessed by flow cytometry (n=3 per group). Numbers in plots indicate the percentage of cells for the indicated markers. (e) *In vitro* incubation of bone marrow-derived MDSCs with GM-CSF (10ng/ml) and vehicle (control) or GSK343 for 5 days. Flow cytometry of the percentage of CD11b<sup>+</sup>CD11c<sup>+</sup> DC (n=3 per group). (b-e) Data are representative of three independent experiments. n.s.= not significant (as determined by unpaired two-tailed Student's *t*-test). Error bars indicate means ± SEM. Source data are provided as a Source Data file.

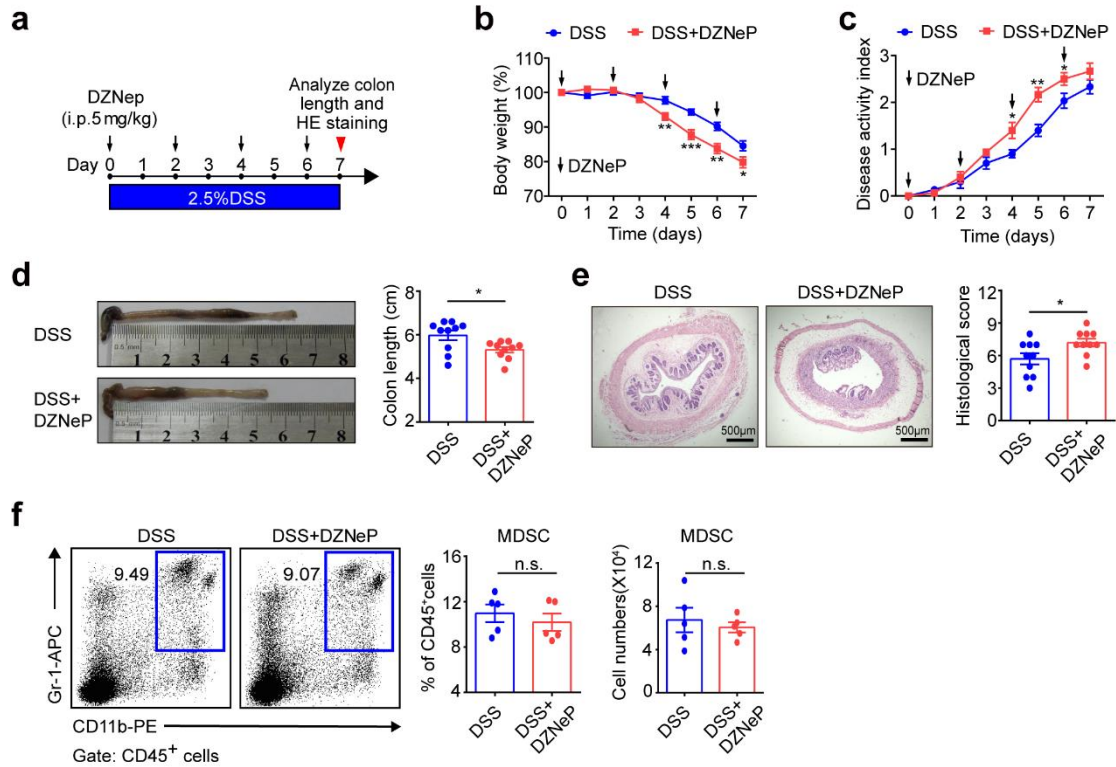

**Supplementary Figure 10. Inhibition of EZH2 with DZNeP aggravates colitis.** (a) Protocol for DSS colitis in C57BL/6 mice and DZNeP administration. (b, c) Body weight (b) and disease activity index (c) of mice that received 2.5% DSS or 2.5% DSS combined with DZNeP injection (n=10 per group). Asterisk indicates DSS versus DSS+ DZNeP. (d, e) Colon length (d), representative H&E staining of histological sections of the distal colon and corresponding histological scores (e) at day 7 after DSS administration (n = 10 per group). (f) At day 5, the representative staining, percentage and absolute number of MDSCs (CD11b<sup>+</sup> Gr-1<sup>+</sup>) in CD45<sup>+</sup> cells of the cLP were determined by flow cytometry (n = 5 per group). Dot plots are gated on CD45<sup>+</sup> cells. Numbers adjacent to the outlined areas indicate the percentage of the gated population in each group. Data are representative of three independent experiments. \**P* < 0.05 by log-rank test. (b-f) Data are representative of three independent experiments. The statistical significance of differences was determined by two-way analysis of variance with Bonferroni post-test (b, c) and unpaired two-tailed Student's *t*-test (d-f). \**P* < 0.05, \*\**P* < 0.01, \*\*\**P* < 0.001, n.s. = not significant. Results are presented as the means ± SEM. Source data are provided as a Source Data file.

**Supplementary Table 1.** Primer sequences for real-time PCR analyses.

|        |         |                        |
|--------|---------|------------------------|
| Arg-1  | Forward | CTCCAAGCCAAAGTCCTTAGAG |
|        | Reverse | AGGAGCTGTCATTAGGGACATC |
| iNOS   | Forward | CCAAGCCCTCACCTACTTCC   |
|        | Reverse | CTCTGAGGGCTGACACAAGG   |
| CXCL1  | Forward | GCCTCTAACCAGTTCCAGCA   |
|        | Reverse | TTGAGGTGAATCCCAGCCAT   |
| CXCL2  | Forward | GGCAAGGCTAACTGACCTGG   |
|        | Reverse | CTCAGACAGCGAGGCACATC   |
| CXCL5  | Forward | GCCCTACGGTGGAAGTCATA   |
|        | Reverse | GAACACTGGCCGTTCTTTCC   |
| CXCL12 | Forward | GGTGCTCAAACCTGACGGTA   |
|        | Reverse | GGCAGCTCCTCTTTGGCTTA   |
| GAPDH  | Forward | CCCATGGCAAATTCCATGGCA  |
|        | Reverse | ACGGCAGGTCAGGTCCACC    |
